# Supplementary material for: High-field antiferroelectric-like behavior in uniaxially stretched poly(vinylidene fluoride-trifluoroethylene-chlorotrifluoroethylene)-grafted-poly(methyl methacrylate) films with high energy density
Source: Royal Society of Chemistry journal article supplement (doi:10.1039/c5ra22617a), 2015-12-18
Supplement: c5ra22617a1.pdf [file c5ra22617a1.pdf]

## Electronic Supplementary Information

### **High-field Antiferroelectric-like Behavior in Uniaxially Stretched Poly(vinylidene fluoride-trifluoroethylene-chlorotrifluoroethylene) - *grafted*-poly(methyl methacrylate) Films with High Energy Density**

Honghong Gong<sup>a</sup>, Bei Miao<sup>a</sup>, Xiao Zhang<sup>b</sup>, Junyong Lu<sup>\*b</sup>, Zhicheng Zhang<sup>\*a</sup>

<sup>a</sup>*Department of Applied Chemistry, MOE Key Laboratory for Nonequilibrium Synthesis and Modulation of Condensed Matter, School of Science, Xi'an Jiaotong University, Xi'an, P. R. China, 710049*

<sup>b</sup>*National Key Laboratory of Science and Technology on Vessel Integrated Power System, Naval University of Engineering, Wuhan, P. R. China, 430034*

\*Email: [zhichengzhang@mail.xjtu.edu.cn](mailto:zhichengzhang@mail.xjtu.edu.cn) [jylu@xinhuanet.com](mailto:jylu@xinhuanet.com)

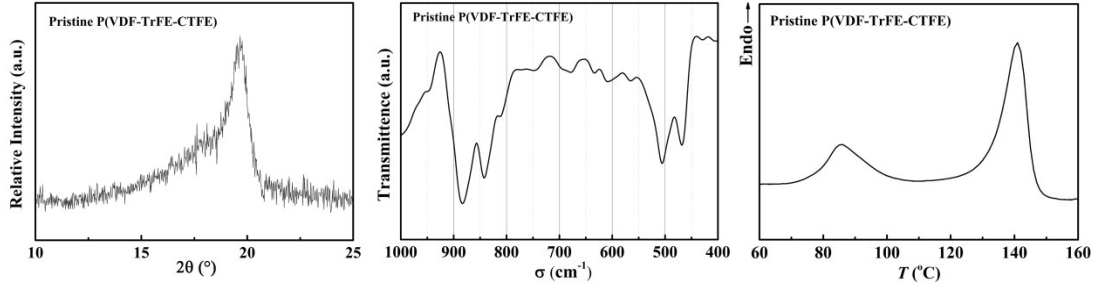

**Fig. S1.** XRD, FTIR spectrum and DSC curve of pristine P(VDF-TrFE-CTFE)(80/18/2).

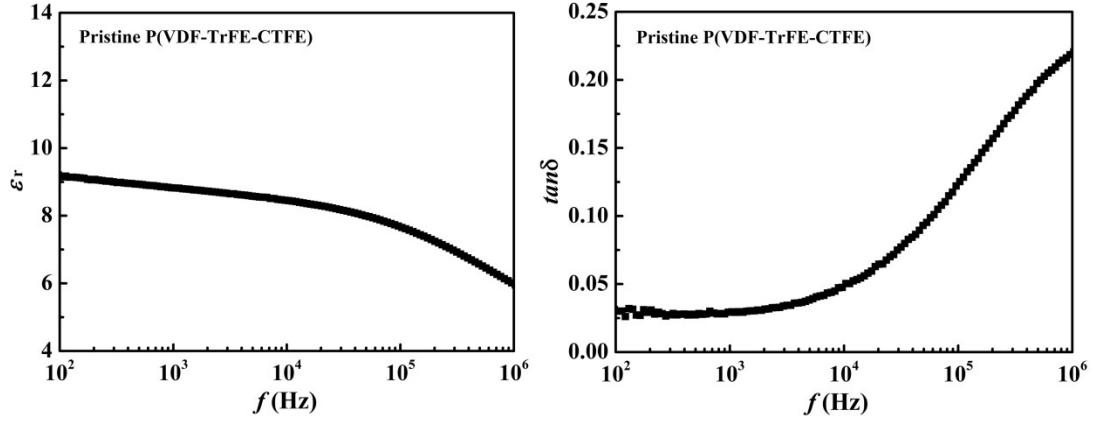

**Fig. S2.** Dielectric constant and loss of pristine P(VDF-TrFE-CTFE)(80/18/2).

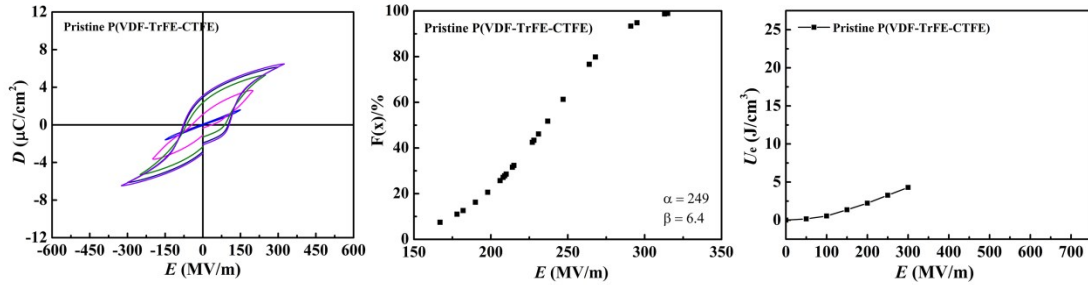

**Fig. S3.** Bipolar D-E loops, Weibull distribution of the breakdown electric field and discharged energy density ( $U_e$ ) as a function of electric field for pristine P(VDF-TrFE-CTFE)(80/18/2).

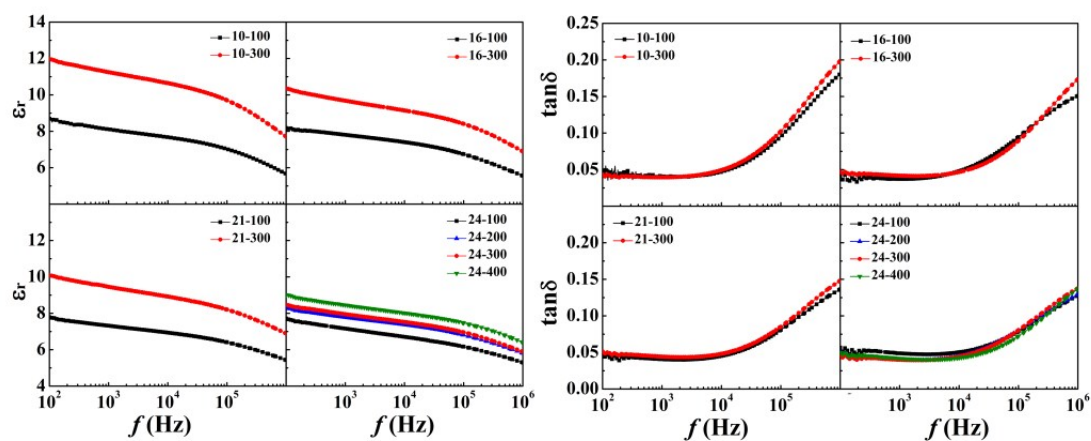

Fig. S4 Dielectric constant and loss of P(VDF-TrFE-CTFE)-g-PMMA films with varied PMMA contents before and after uniaxial stretching.
